1 **Title Page**

2

3 **Forecasting COVID-19 cases and deaths in epidemic-mitigating European**  
4 **countries by Richards function-based regression analyses**

5 Cheng Long<sup>1</sup>, Xinmiao Fu<sup>2, \*</sup>

6

7 <sup>1</sup> Department of Orthopaedic, Sichuan University West China Hospital, Chengdu City, Sichuan Province  
8 610041, China

9

10 <sup>2</sup> Provincial University Key Laboratory of Cellular Stress Response and Metabolic Regulation, College of  
11 Life Sciences, Fujian Normal University, Fuzhou City, Fujian Province 350117, China

12

13 \* To whom correspondence should be addressed to Professor Xinmiao Fu (xmfu@fjnu.edu.cn)

14

15 **Running title:** Forecasting COVID-19 outbreaks in 10 European countries

16

17 **Keywords:** COVID-19, SARS-CoV-2, Richards function, coronavirus, pandemic, total  
18 confirmed cases, total COVID-19 deaths

19

20 Word counts: 951

21

22

23

24

25

26 **Abstract: The COVID-19 pandemic has hit many countries, and in some European**  
27 **countries it has been mitigated since April. Here we applied Richards function to simulate**  
28 **and forecast the course of COVID-19 epidemics in Italy, Spain, France, Germany, Turkey,**  
29 **Belgium, Ireland, Netherlands, Portugal and Switzerland. Potential total COVID-19**  
30 **confirmed cases in these countries were estimated to be 240400±1300, 294100±4000,**  
31 **178500±800, 176900±700, 155400±1000, 57900±400, 24000±200, 46200±300, 30000±300**  
32 **and 30700±100 respectively. Most of these countries are predicted to approach ending**  
33 **stage between late May and early June such that daily new cases will become minimal,**  
34 **which may guide societal and economic restorations. In addition, total COVID-19 deaths**  
35 **were estimated to be 33500 ±300, 28200±200, 27800±200, 8740±80, 4500 ±30, 9250±70,**  
36 **1530±20, 6240±50, 1380±10 and 1960±8, respectively. To our best knowledge, this is the**  
37 **first study forecasting the COVID-19 epidemic by applying the Richard function-based**  
38 **regression analysis.**

39

## 40 **Introduction**

41 The COVID-19 pandemic caused by the novel coronavirus (SARS-CoV-2) has hit many  
42 countries [1], resulting in more than 4 million cases and over 300,000 deaths in the world as of  
43 May 14, 2020. In European countries such as Italy and Spain, daily new cases are declining  
44 since April, yet they are still as many as one thousand per day. In these epidemic-mitigating  
45 countries, governments are attempting to restore normal societal and economic activity,  
46 however, concerns are raised about the risk of COVID-19 resurgence. It is of significance to  
47 precisely forecast when the epidemic in each country will become minimal such that societal  
48 and economic restorations will not lead in the resurgence of the outbreak. Further, such  
49 forecasting may also inform governments to get better preparedness for making control  
50 measures and supplying medical resources. Estimations by traditional epidemiological models  
51 apparently require much detailed data for analysis [2, 3]. Here we applied a simple data-driven,  
52 Richards function-based approach for epidemic forecasting only based on the daily cumulative  
53 confirmed COVID-19 cases. This approach has been explored for simulating 2003 SARS  
54 outbreaks in several regions/countries by others [4, 5] and also for estimating COVID-19 deaths  
55 in China by us recently [6].

56

## 57 **Methods**

58 The Richards function is expressed as follows [4, 5]:

59 
$$y = a * (1 + (d - 1) * \exp((x - xc) * k))^{1 / (1 - d)} \quad (1)$$

60 where  $y$  is the daily cumulative number of confirmed COVID-19 cases and  $x$  is day;  $a$ ,  $d$ ,  $xc$  and  
61  $k$  are constants. Specifically, total number of COVID-19 cases are given by parameter  $a$  in the  
62 equation. Simulation was performed using Microcal Origin software with the Richard function.

## 63 **Results**

### 64 **Estimation of potential total COVID-19 confirmed cases**

65 We decided to collect the data of the cumulative confirmed cases from the website of  
66 Worldometer [7] for 10 most affected and epidemic-mitigating European countries, i.e., Italy,  
67 Spain, France, Germany, Turkey, Belgium, Ireland, Netherlands, Portugal and Switzerland (for  
68 detail, refer to the supporting information file **original data.xlsx**). Regression analyses indicate  
69 that the data of each country were well fitted with the Richards function (all  $R^2$  values being  
70 close to 0.999; **Table 1** and **Figure 1**). Potential total numbers of confirmed cases in the above  
71 countries were estimated to be  $240400 \pm 1300$ ,  $294100 \pm 4000$ ,  $178500 \pm 800$ ,  $176900 \pm 700$ ,  
72  $155400 \pm 1000$ ,  $57900 \pm 400$ ,  $24000 \pm 200$ ,  $46200 \pm 300$ ,  $30000 \pm 300$  and  $30700 \pm 100$  respectively.  
73 All parameters from regression analyses are presented in **Table S1** and can be utilized to predict  
74 daily new cases in each country since May 15 according to equation 1.

75

76 In addition, we estimated the key date, on which daily new cases are lower than 0.1% of the  
77 potential total confirmed cases as defined by us subjectively. It appears that most countries will  
78 approach such late stage between late May and early June (refer to **Table 1**) such that daily new  
79 cases will become minimal in comparison with potential total confirmed cases. In our opinion,  
80 nationwide societal and economic restorations should be initiated at least not earlier than the  
81 estimated key dates, although local restorations may be operated earlier according to the local  
82 epidemic situation.

### 83 **Estimation of potential total COVID-19 deaths**

84 In several countries, crude fatality ratios are as high as over 10% such that people have raised  
85 grave concerns about how many patients will die eventually. Assuming that the number of  
86 deaths is proportional to the number of confirmed cases for the COVID-19 outbreak under  
87 specific circumstances, we speculated that the cumulative COVID-19 deaths would also obey  
88 the Richards function. Regression analyses indicate that the data of cumulative COVID-19  
89 deaths in each country were well fitted with the Richards function (all  $R^2$  values being close to  
90 0.999; **Table 1** and **Figure 2**). All parameters of regression analyses are displayed in **Table S2**  
91 and can be utilized to predict daily new deaths in each country since May 15 according to  
92 equation 1. Potential total COVID-19 deaths in Italy, Spain, France, Germany, Turkey, Belgium,

93 Ireland, Netherlands, Portugal and Switzerland were estimated to be  $33500 \pm 300$ ,  $28200 \pm 200$ ,  
94  $27800 \pm 200$ ,  $8740 \pm 80$ ,  $4500 \pm 30$ ,  $9250 \pm 70$ ,  $1530 \pm 20$ ,  $6240 \pm 50$ ,  $1380 \pm 10$  and  $1960 \pm 8$ ,  
95 respectively. Crude fatality ratios (total deaths among total confirmed cases) of these countries  
96 could be estimated to be  $13.9 \pm 0.9\%$ ,  $9.6 \pm 0.9\%$ ,  $15.6 \pm 0.7\%$ ,  $4.9 \pm 0.9\%$ ,  $2.9 \pm 0.7\%$ ,  $16.0 \pm 0.9\%$ ,  
97  $6.4 \pm 1.3\%$ ,  $13.5 \pm 0.9\%$ ,  $4.6 \pm 0.8\%$  and  $6.4 \pm 0.4\%$ , respectively.

98

## 99 **Discussion**

100 To our best knowledge, this is the first study forecasting the COVID-19 epidemic by applying  
101 the Richard function-based regression analysis. It should be pointed out that all the above  
102 estimates are based on the assumption that there are no significant changes regarding the current  
103 interventions, including non-pharmacological interventions such as quarantine and other  
104 prevention measures and also diagnosis and treatment approaches. In addition, UK and Sweden,  
105 two most affected European countries with more than 240,000 and 29,000 COVID-19  
106 confirmed cases as of May 15, respectively, were not subjected to analysis because their daily  
107 new cases have not yet started to significantly decline (**Figure. S1**).

108

109 Collectively, our forecasting on the course of COVID-19 outbreaks in these European countries  
110 may provide valuable guidance for governments and also the public to get better preparedness  
111 and optimize their efforts to contain this unprecedented crisis at current critical stage. The  
112 estimated key date for each country may serve as a reference for operating societal and  
113 economic restorations such that the resurgence of COVID-19 can be avoided, minimized or  
114 under control according to COVID-19 containment in China [8, 9]. In addition, because  
115 thousands of COVID-19 patients have died in these countries, our prediction on the course of  
116 COVID-19 deaths (refer to **Figure 2** and **Table S2**) may benefit the mental health service that  
117 needs to be timely provided to the families of passed patients [10]. As a matter of fact, we  
118 precisely estimated total COVID-19 deaths in different areas of China (including Hubei  
119 Province and Wuhan city, the epicenter of the COVID-19 outbreaks in China [1]) by applying  
120 both Boltzmann and Richards functions-based regression analyses [6]. Such estimation help  
121 governments to evaluate the severity of the COVID-19 epidemics.

122

## 123 **Acknowledgments**

124 This work is support by the National Natural Science Foundation of China (No. 31972918 and  
125 31770830 to XF). We thank graduate students (Zuqin Zhang, Youhui Zeng, Shuting Shi and  
126 Zhijie Huang, all from Professor Fu's research group at Fujian Normal University) for data  
127 collection.

128

129 **Author contribution:** X.F. designed the study; C.L. organized data and performed analysis;  
130 X.F. wrote the manuscript.

131

132 **Conflict of interest:** none.

133

134

## 135 **References**

136 (1) WHO: Coronavirus disease (COVID-19) outbreak,  
137 <https://www.who.int/emergencies/diseases/novel-coronavirus-2019>.

138 (2) **Wu JT, Leung K, Leung GM.** Nowcasting and forecasting the potential domestic and international spread of  
139 the 2019-nCoV outbreak originating in Wuhan, China: a modelling study. *Lancet* 2020; DOI:  
140 10.1016/S0140-6736(1020)30260-30269.

141 (3) **Yang Y, et al.** Epidemiological and clinical features of the 2019 novel coronavirus outbreak in China.  
142 <https://doi.org/10.1101/2020021020021675> 2020.

143 (4) **Wang XS, Wu J, Yang Y.** Richards model revisited: Validation by and application to infection dynamics. *J Theor*  
144 *Biol* 2012; **313**: 12–19.

145 (5) **Hsieh YH.** Richards Model: A Simple Procedure for Real-time Prediction of Outbreak Severity. *Modeling and*  
146 *Dynamics of Infectious Diseases* 2009; p. 216-236 [https://doi.org/210.1142/9789814261265\\_9789814260009](https://doi.org/210.1142/9789814261265_9789814260009).

147 (6) **Gao Y, et al.** Forecasting the cumulative number of COVID-19 deaths in China: a Boltzmann function-based  
148 modeling study. *Infect Control Hosp Epidemiol* 2020; 1-3.

149 (7) Worldometer: COVID-19 CORONAVIRUS PANDEMIC, <https://www.worldometers.info/coronavirus/>.

150 (8) Report of the WHO-China Joint Mission on Coronavirus Disease 2019 (COVID-19),  
151 <https://www.who.int/docs/default-source/coronaviruse/who-china-joint-mission-on-covid-19-final-report.pdf>;  
152 2020.

153 (9) National Health Commission of China: Update of the COVID-19 Outbreak Data (in Chinese),  
154 [http://www.nhc.gov.cn/xcs/yqfkd\\_t/gzbd\\_index.shtml](http://www.nhc.gov.cn/xcs/yqfkd_t/gzbd_index.shtml).

155 (10) **Xiang YT, et al.** Timely mental health care for the 2019 novel coronavirus outbreak is urgently needed. *Lancet*  
156 *Psychiatry* 2020; **7**(3): 228-229.

157

158

159 **Table 1 Estimation of potential total COVID-19 confirmed cases and deaths in European**  
 160 **countries.**

| Countries   | Total confirmed cases |                | Key date <sup>a</sup> | Total deaths |                | Crude 161 fatality ratio (%) <sup>b</sup> |
|-------------|-----------------------|----------------|-----------------------|--------------|----------------|-------------------------------------------|
|             | Number                | R <sup>2</sup> |                       | Number       | R <sup>2</sup> |                                           |
| Italy       | 240400±1300           | 0.999          | June 6                | 33500 ±300   | 0.999          | 13.9±0.9                                  |
| Spain       | 294100±4000           | 0.999          | June 13               | 28200±200    | 0.999          | 9.6±0.9                                   |
| France      | 178500±800            | 0.999          | May 18                | 27800±200    | 0.999          | 15.6±0.7                                  |
| Germany     | 176900±700            | 0.999          | May 24                | 8740±80      | 0.999          | 4.9±0.9                                   |
| Turkey      | 155400±1000           | 0.999          | June 8                | 4500 ±30     | 0.999          | 2.9±0.7                                   |
| Belgium     | 57900±400             | 0.999          | June 5                | 9250±70      | 0.999          | 16.0±0.9                                  |
| Ireland,    | 24000±200             | 0.998          | May 25                | 1530±20      | 0.997          | 6.4±1.3                                   |
| Netherlands | 46200±300             | 0.999          | June 4                | 6240±50      | 0.999          | 13.5±0.9                                  |
| Portugal    | 30000±300             | 0.999          | June 9                | 1380±10      | 0.999          | 4.6±0.8                                   |
| Switzerland | 30700±100             | 0.999          | May 14                | 1960±8       | 0.999          | 6.4±0.4                                   |

162 <sup>a</sup> Key date is determined when daily new cases are less than 0.1% of the potential total confirmed cases.

163 <sup>b</sup> Crude fatality ratio was calculated as total deaths among total confirmed cases, and the standard deviation  
 164 was calculated according to partial differential equations.

165

166

## 167 Figures and legends

Figure 1

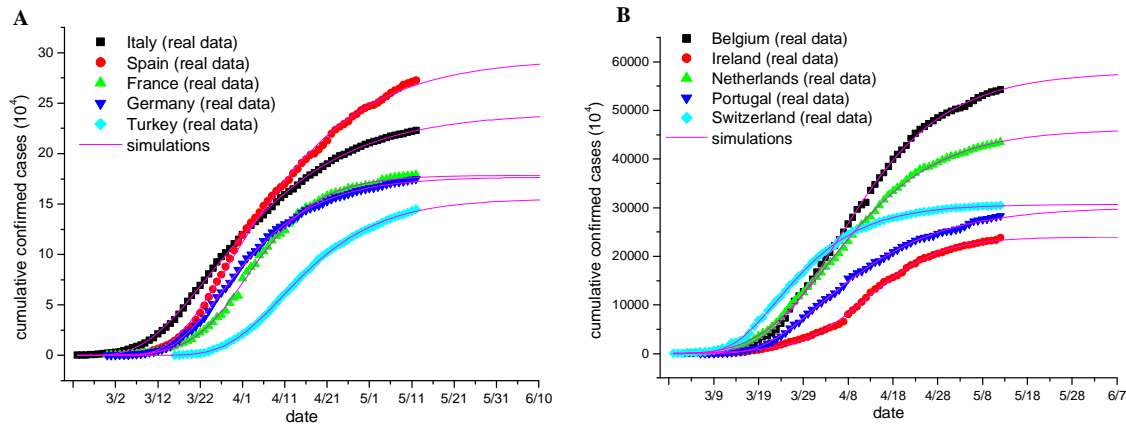

168

### 169 Figure 1. Fitting the cumulative confirmed COVID-19 cases of each 170 European country to the Richards function

171 (A, B) Plots of the cumulative number of COVID-19 confirmed cases of the indicated European  
172 countries as of May 14, 2020, with the simulation results being plotted as Magenta lines.  
173 Simulation was performed using Microcal Origin software with the Richard function. All  
174 parameters from regression analyses are shown in Table S1.

175

176

177

Figure 2

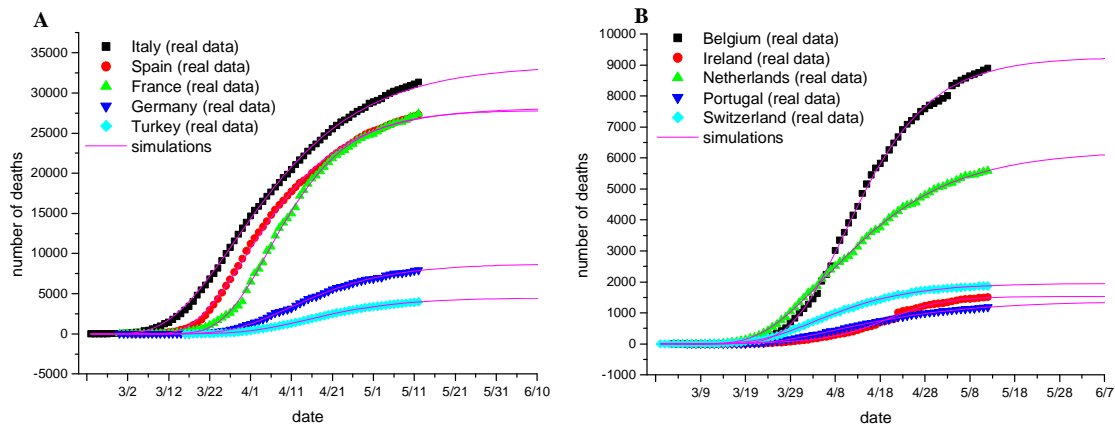

178

179 **Figure 2. Fitting the cumulative COVID-19 deaths of each European country**  
180 **to the Richards function**

181 (A, B) Plots of the cumulative number of COVID-19 confirmed cases of the indicated European  
182 countries as of May 14, 2020, with the simulation results being plotted as Magenta lines.  
183 Simulation was performed using Microcal Origin software with the Richard function. All  
184 parameters from regression analyses are shown in Table S2.

185

186
